# Supplementary material for: Metal-free, catalytic regioselective oxidative conversion of vinylarenes: a mild approach to phenylacetic acid derivatives
Source: Royal Society of Chemistry journal article supplement (doi:10.1039/c5ra25296b), 2016-01-01
Supplement: c5ra25296b1.pdf [file c5ra25296b1.pdf]

## Supporting Information

# Metal-Free, Catalytic Regioselective Oxidative Conversion of Vinylarenes: A Mild Approach to Phenylacetic Acid Derivatives

Srujana Kodumuri,<sup>a</sup> Swamy Peraka,<sup>a,b</sup> Naresh Mameda,<sup>a,b</sup> Durgaiiah Chevella,<sup>a</sup> Rammurthy Banothu<sup>a,b</sup> and Narender Nama <sup>\*a,b</sup>

<sup>a</sup>I&PC Division, CSIR-Indian Institute of Chemical Technology, Hyderabad 500 007, India

<sup>b</sup>Academy of Scientific and Innovative Research, Hyderabad 500 007, India

Tel.: +91-40-27191703; Fax: +91-40-27160387/27160757;

E-mail: narendern33@yahoo.co.in; nama@iict.res.in

### Table of contents

|                                                                                  |        |
|----------------------------------------------------------------------------------|--------|
| 1. Experimental section.....                                                     | S2-S3  |
| 2. Spectroscopic data of all products .....                                      | S4-S6  |
| 3. Copies of <sup>1</sup> H and <sup>13</sup> C NMR spectra of all products..... | S7-S24 |
| 4. Notes and references.....                                                     | S25    |

## 1. Experimental section

### i) General Information

All chemicals (reagent grade) were purchased from Sigma-Aldrich and used as received without further purification.  $^1\text{H}$  NMR spectra were recorded at 300 or 500 MHz and  $^{13}\text{C}$  NMR spectra at 75 or 125 MHz in  $\text{CDCl}_3$ . The chemical shifts ( $\delta$ ) are reported in ppm units relative to TMS as an internal standard for  $^1\text{H}$  NMR and  $\text{CDCl}_3$  for  $^{13}\text{C}$  NMR spectra. Coupling constants ( $J$ ) are reported in hertz (Hz) and multiplicities are indicated as follows: s (singlet), brs (broad singlet), d (doublet), dd (doublet of doublet), m (multiplet). TLC inspections were performed on Silica gel 60  $\text{F}_{254}$  plates. Column chromatography was performed on silica gel (100-200 mesh) using *n*-hexane-EtOAc as eluent.

### ii) Typical procedure for the oxidative conversion of styrene (**1a**) to phenyl acetic acid (**2a**)

To a oven dried doubled necked round bottom flask charged with 4 mL of 1,2-dimethoxy ethane (DME) and 1 mL of water was added  $\text{I}_2$  (0.025 g; 10 mol%) and styrene (**1a**) (0.104 g, 0.114 mL; 1 mmol). The mixture was stirred for 1 min and the oxone (1.229 g; 2 mmol) was slowly added and continued the stirring at room temperature. The reaction was stopped after 6 h (after completion of the reaction indicated by TLC). The product mixture was extracted with ethyl acetate (3 x 25 mL) and the combined organic layers treated with 5% aqueous sodium thiosulfate (5 mL) solution. Next, the organic layer was dried over anhydrous  $\text{Na}_2\text{SO}_4$ . The solvent was removed on vacuo and the residue was purified by column chromatography (on silica gel using *n*-hexane-ethyl acetate as eluent) to yield **2a** in 0.120 g (88%) as colourless solid.

### iii) General procedure for the oxidative conversion of **1b-1s**

All the reactions of the substrates **1b-1s** were carried out using the typical procedure used for the oxidative conversion of styrene (**1a**) to phenyl acetic acid (**2a**).

### iv) Typical procedure for large-scale experiment (20 mmol scale reaction of styrene (**1a**))

To a oven dried doubled necked round bottom flask charged with 40 mL of 1,2-dimethoxy ethane (DME) and 10 mL of water was added  $\text{I}_2$  (0.507 g; 10 mol%) and styrene (**1a**) (2.083 g, 2.29 mL; 20 mmol). The mixture was stirred for 1 min and the oxone (24.590 g;

40 mmol) was slowly added and continued the stirring at room temperature. The reaction was stopped after 6 h (after completion of the reaction indicated by TLC). The product mixture was extracted with ethyl acetate (1 x 150 and 2 x 100 mL) and the combined organic layers treated with 5% aqueous sodium thiosulfate (25 mL) solution. Next, the organic layer was dried over anhydrous Na<sub>2</sub>SO<sub>4</sub>. The solvent was removed on vacuo and the residue was purified by column chromatography (on silica gel using *n*-hexane-ethyl acetate as eluent) to yield **2a** in 2.258 g (83%) as colourless solid.

**v) Typical procedure for large-scale experiment (45 mmol scale reaction of styrene (1a))**

To a oven dried doubled necked round bottom flask charged with 80 mL of 1,2-dimethoxy ethane (DME) and 20 mL of water was added I<sub>2</sub> (1.142 g; 10 mol%) and styrene (**1a**) (4.686 g, 5.15 mL; 45 mmol). The mixture was stirred for 1 min and the oxone (55.328 g; 90 mmol) was slowly added and continued the stirring at room temperature. The reaction was stopped after 6 h (after completion of the reaction indicated by TLC). The product mixture was extracted with ethyl acetate (1 x 200 and 2 x 125 mL) and the combined organic layers treated with 5% aqueous sodium thiosulfate (60 mL) solution. Next, the organic layer was dried over anhydrous Na<sub>2</sub>SO<sub>4</sub>. The solvent was removed on vacuo and the residue was purified by column chromatography (on silica gel using *n*-hexane-ethyl acetate as eluent) to yield **2a** in 5.202 g (85%) as colourless solid.

**vi) Typical procedure for large-scale experiment (100 mmol scale reaction of styrene (1a))**

To a oven dried doubled necked round bottom flask charged with 120 mL of 1,2-dimethoxy ethane (DME) and 30 mL of water was added I<sub>2</sub> (2.538 g; 10 mol%) and styrene (**1a**) (10.414 g, 11.45 mL; 100 mmol). The mixture was stirred for 1 min and the oxone (122.952 g; 200 mmol) was slowly added and continued the stirring at room temperature. The reaction was stopped after 6 h (after completion of the reaction indicated by TLC). The product mixture was extracted with ethyl acetate (1 x 250 and 2 x 150 mL) and the combined organic layers treated with 5% aqueous sodium thiosulfate (120 mL) solution. Next, the organic layer was dried over anhydrous Na<sub>2</sub>SO<sub>4</sub>. The solvent was removed on vacuo and the residue was purified by column chromatography (on silica gel using *n*-hexane-ethyl acetate as eluent) to yield **2a** in 11.696 g (86%) as colourless solid.

## 2. Spectroscopic data:

### 2-Phenylacetic acid (2a)<sup>1</sup>

<sup>1</sup>H NMR (400 MHz, CDCl<sub>3</sub>):  $\delta$  (ppm) = 7.24-7.36 (m, 5H), 3.64 (s, 2H).

<sup>13</sup>C NMR (75 MHz, CDCl<sub>3</sub>):  $\delta$  (ppm) = 177.88, 133.18, 129.34, 128.61, 127.33, 41.01.

### 2-(*p*-tolyl)Acetic acid (2b)<sup>2</sup>

<sup>1</sup>H NMR (500 MHz, CDCl<sub>3</sub>):  $\delta$  (ppm) = 7.12-7.17 (m, 4H), 3.60 (s, 2H), 2.32 (s, 3H).

<sup>13</sup>C NMR (75 MHz, CDCl<sub>3</sub>):  $\delta$  (ppm) = 178.21, 136.90, 130.15, 129.25, 129.13, 40.58, 21.00.

### 2,4-Dimethylphenylacetic acid(2c)<sup>3</sup>

<sup>1</sup>H NMR (300 MHz, CDCl<sub>3</sub>):  $\delta$  (ppm) = 6.96-7.08 (m, 3H), 3.61 (s, 2H), 2.29 (s, 3H), 2.27 (s, 3H).

<sup>13</sup>C NMR (75 MHz, CDCl<sub>3</sub>):  $\delta$  (ppm) = 178.12, 137.25, 136.65, 131.20, 130.16, 128.93, 126.82, 38.44, 20.95, 19.42.

### (4- *tert*-butylphenyl)Acetic acid (2d)<sup>4</sup>

<sup>1</sup>H NMR (300 MHz, CDCl<sub>3</sub>):  $\delta$  (ppm) = 7.34 (d,  $J$  = 8.24 Hz, 2H), 7.21 (d,  $J$  = 8.39 Hz, 2H), 3.59 (s, 2H), 1.30 (s, 9H).

<sup>13</sup>C NMR (75 MHz, CDCl<sub>3</sub>):  $\delta$  (ppm) = 178.18, 150.08, 130.15, 128.96, 125.50, 40.52, 34.38, 31.24.

### 2-(4-methoxyphenyl)Acetic acid (2e)<sup>1</sup>

<sup>1</sup>H NMR (500 MHz, CDCl<sub>3</sub>):  $\delta$  (ppm) = 7.19 (d,  $J$  = 8.69 Hz, 2H), 6.86 (d,  $J$  = 8.69 Hz, 2H), 3.79 (s, 3H), 3.58 (s, 2H).

<sup>13</sup>C NMR (125 MHz, CDCl<sub>3</sub>):  $\delta$  (ppm) = 177.75, 158.81, 130.37, 125.34, 114.04, 55.23, 40.09.

### (2-methoxyphenyl)Acetic acid (2f)<sup>5</sup>

<sup>1</sup>H NMR (500 MHz, CDCl<sub>3</sub>):  $\delta$  (ppm) = 7.18-7.29 (m, 2H), 6.88-6.94 (m, 2H), 3.83 (s, 3H), 3.66 (s, 2H).

<sup>13</sup>C NMR (125 MHz, CDCl<sub>3</sub>):  $\delta$  (ppm) = 176.64, 157.38, 130.96, 128.84, 122.33, 120.61, 110.53, 55.47, 35.75.

### 2-(4-fluorophenyl)Acetic acid (2g)<sup>6</sup>

<sup>1</sup>H NMR (300 MHz, CDCl<sub>3</sub>):  $\delta$  (ppm) = 10.54 (brs, 1H), 7.23 (dd,  $J$  = 5.47, 8.68 Hz, 2H), 7.00 (t,  $J$  = 8.68 Hz, 2H), 3.60 (s, 2H).

<sup>13</sup>C NMR (125 MHz, CDCl<sub>3</sub>):  $\delta$  (ppm) = 177.47, 163.09, 130.90, 128.86, 115.42, 40.10.

### 2-(4-chlorophenyl)Acetic acid (2h)<sup>7</sup>

$^1\text{H}$  NMR (400 MHz,  $\text{CDCl}_3$ ):  $\delta$  (ppm) = 7.30 (d,  $J$  = 8.43 Hz, 2H), 7.21 (d,  $J$  = 8.55 Hz, 2H), 3.61 (s, 2H).

$^{13}\text{C}$  NMR (100 MHz,  $\text{CDCl}_3$ ):  $\delta$  (ppm) = 177.33, 133.35, 131.55, 130.71, 128.76, 40.27.

**2-(4-bromophenyl)Acetic acid (2i)<sup>8</sup>**

$^1\text{H}$  NMR (500 MHz,  $\text{CDCl}_3$ ):  $\delta$  (ppm) = 7.46 (d,  $J$  = 8.39 Hz, 2H), 7.16 (d,  $J$  = 8.39 Hz, 2H), 3.60 (s, 2H).

$^{13}\text{C}$  NMR (125 MHz,  $\text{CDCl}_3$ ):  $\delta$  (ppm) = 177.07, 132.11, 131.71, 131.06, 121.43, 40.34.

**2-(3-bromophenyl)Acetic acid (2j)<sup>2</sup>**

$^1\text{H}$  NMR (500 MHz,  $\text{CDCl}_3$ ):  $\delta$  (ppm) = 10.95 (brs, 1H), 7.40-7.44 (m, 2H), 7.18-7.20 (m, 2H), 3.61 (s, 2H).

$^{13}\text{C}$  NMR (125 MHz,  $\text{CDCl}_3$ ):  $\delta$  (ppm) = 177.31, 135.23, 132.38, 130.47, 130.07, 128.02, 122.51, 40.50.

**3-Nitrophenylacetic acid (2k)<sup>9a,b</sup>**

$^1\text{H}$  NMR (500 MHz,  $\text{CDCl}_3$ ):  $\delta$  (ppm) = 8.16-8.20 (m, 2H), 7.64-7.66 (m, 1H), 7.52-7.56 (m, 1H), 3.81 (s, 2H).

$^{13}\text{C}$  NMR (125 MHz,  $\text{CDCl}_3$ ):  $\delta$  (ppm) = 176.41, 148.28, 135.64, 135.00, 129.52, 124.45, 122.48, 40.33.

**1-Phenyl-2-propanone (2m)<sup>10</sup>**

$^1\text{H}$  NMR (500 MHz,  $\text{CDCl}_3$ ):  $\delta$  (ppm) = 7.31-7.34 (m, 2H), 7.25-7.28 (m, 1H), 7.19-7.21 (m, 2H), 3.69 (s, 2H), 2.14 (s, 3H).

$^{13}\text{C}$  NMR (125 MHz,  $\text{CDCl}_3$ ):  $\delta$  (ppm) = 206.31, 134.14, 129.29, 128.64, 126.95, 50.91, 29.16.

**1-(4-chlorophenyl)-2-Propanone (2n)<sup>11</sup>**

$^1\text{H}$  NMR (500 MHz,  $\text{CDCl}_3$ ):  $\delta$  (ppm) = 7.31 (d,  $J$  = 8.39 Hz, 2H), 7.13 (d,  $J$  = 8.54 Hz, 2H), 3.67 (s, 2H), 2.17 (s, 3H).

$^{13}\text{C}$  NMR (125 MHz,  $\text{CDCl}_3$ ):  $\delta$  (ppm) = 205.56, 132.89, 132.51, 130.69, 128.74, 49.93, 29.32.

**2-Phenylpropionic acid (2o)<sup>12a,b</sup>**

$^1\text{H}$  NMR (500 MHz,  $\text{CDCl}_3$ ):  $\delta$  (ppm) = 7.25-7.33 (m, 5H), 3.74 (q,  $J$  = 7.17 Hz, 1H), 1.51 (d,  $J$  = 7.17 Hz, 3H).

$^{13}\text{C}$  NMR (125 MHz,  $\text{CDCl}_3$ ):  $\delta$  (ppm) = 180.09, 139.78, 128.63, 127.56, 127.33, 45.29, 18.11.

**Cyclohexane-1,2-diol(2p)<sup>13</sup>**

$^1\text{H}$  NMR (500 MHz,  $\text{CDCl}_3$ ):  $\delta$  (ppm) = 4.54-4.60 (m, 1H), 3.53-3.58 (m, 1H), 2.00-2.10 (m, 2H), 1.69-1.74 (m, 2H), 1.25-1.37 (m, 4H).

$^{13}\text{C}$  NMR (125 MHz,  $\text{CDCl}_3$ ):  $\delta$  (ppm) = 75.81, 32.80, 24.29.

**1-Methyl-cyclohexane-1,2-diol (2q)**<sup>14</sup>

$^1\text{H}$  NMR (500 MHz,  $\text{CDCl}_3$ ):  $\delta$  (ppm) = 3.47-3.51 (m, 1H), 3.16 (brs, 2H), 1.84 (brs, 1H), 1.57-1.77 (m, 3H), 1.25-1.42 (m, 4H), 1.18 (s, 3H).

$^{13}\text{C}$  NMR (125 MHz,  $\text{CDCl}_3$ ):  $\delta$  (ppm) = 77.16, 74.13, 38.58, 31.02, 24.08, 23.20, 19.38.

**Octane-1,2-diol (2r)**<sup>15</sup>

$^1\text{H}$  NMR (300 MHz,  $\text{CDCl}_3$ ):  $\delta$  (ppm) = 3.74–3.63 (m, 2H), 3.43 (dd,  $J$  = 18.82, 7.70 Hz, 1H), 2.48 (brs, 2H), 1.48-1.23 (m, 10H), 0.88 (t,  $J$  = 6.60 Hz, 3H).

$^{13}\text{C}$  NMR (125 MHz,  $\text{CDCl}_3$ ):  $\delta$  (ppm) = 72.33, 66.78, 33.13, 31.72, 29.28, 25.48, 22.56, 14.03.

**Octane-2,3-diol (2s)**<sup>16a,b</sup>

$^1\text{H}$  NMR (300 MHz,  $\text{CDCl}_3$ ):  $\delta$  (ppm) = 3.75-3.85 (m, 1H), 3.60-3.65 (m, 1H), 2.06 (s, 2H), 1.26–1.50 (m, 8H), 1.14 (d,  $J$  = 6.60 Hz, 3H), 0.89 (t,  $J$  = 6.60 Hz, 3H).

$^{13}\text{C}$  NMR (125 MHz,  $\text{CDCl}_3$ ):  $\delta$  (ppm) = 74.90, 70.40, 31.83, 31.70, 25.67, 22.55, 16.45, 13.99.

## Copies of $^1\text{H}$ and $^{13}\text{C}$ NMR spectra:

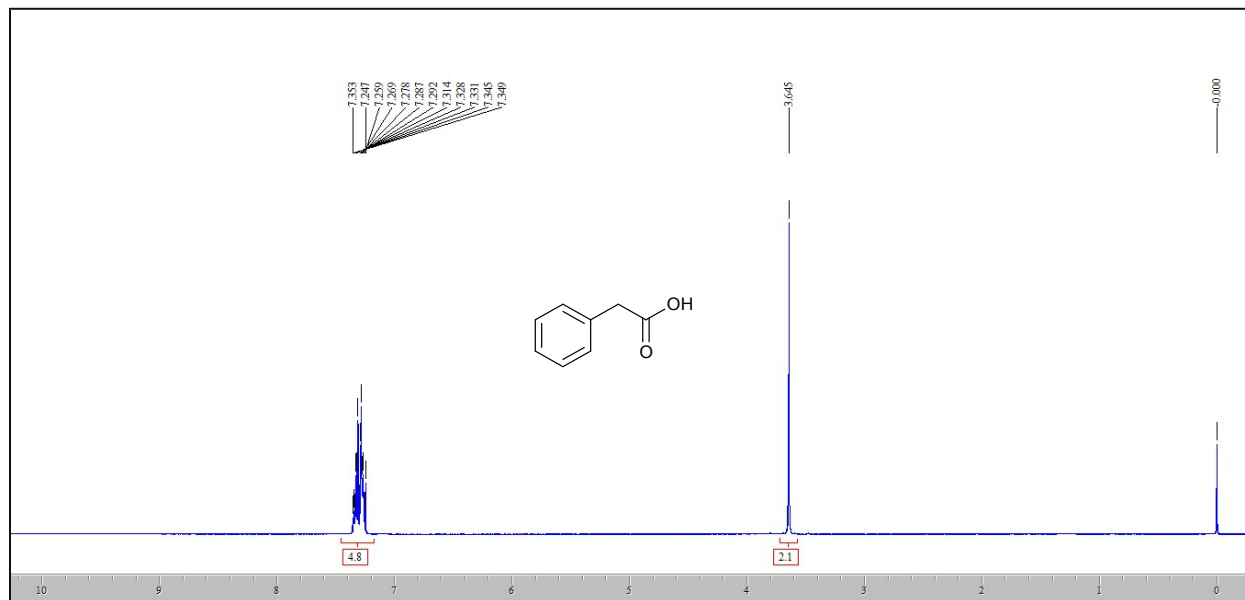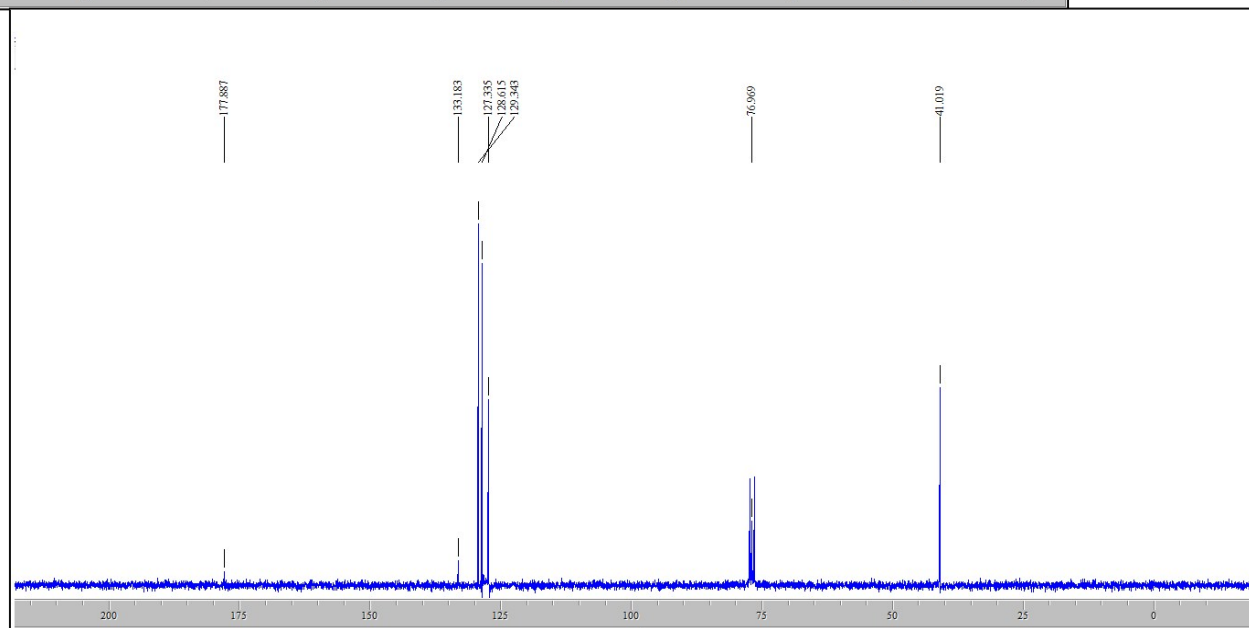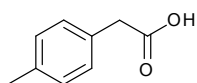

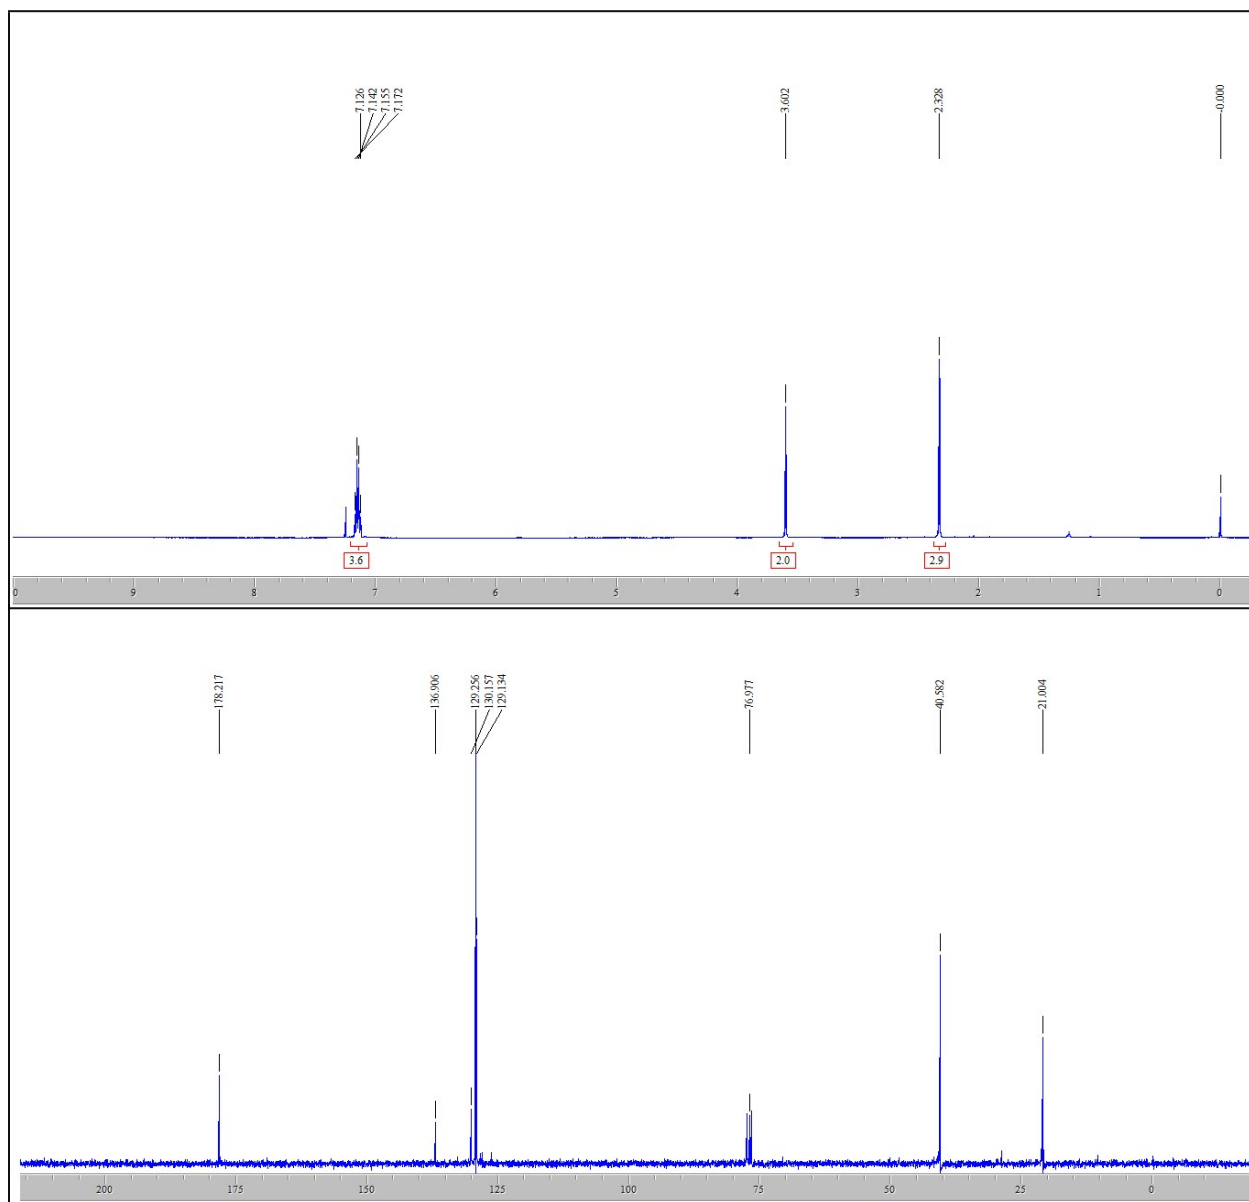

S8

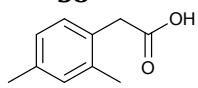



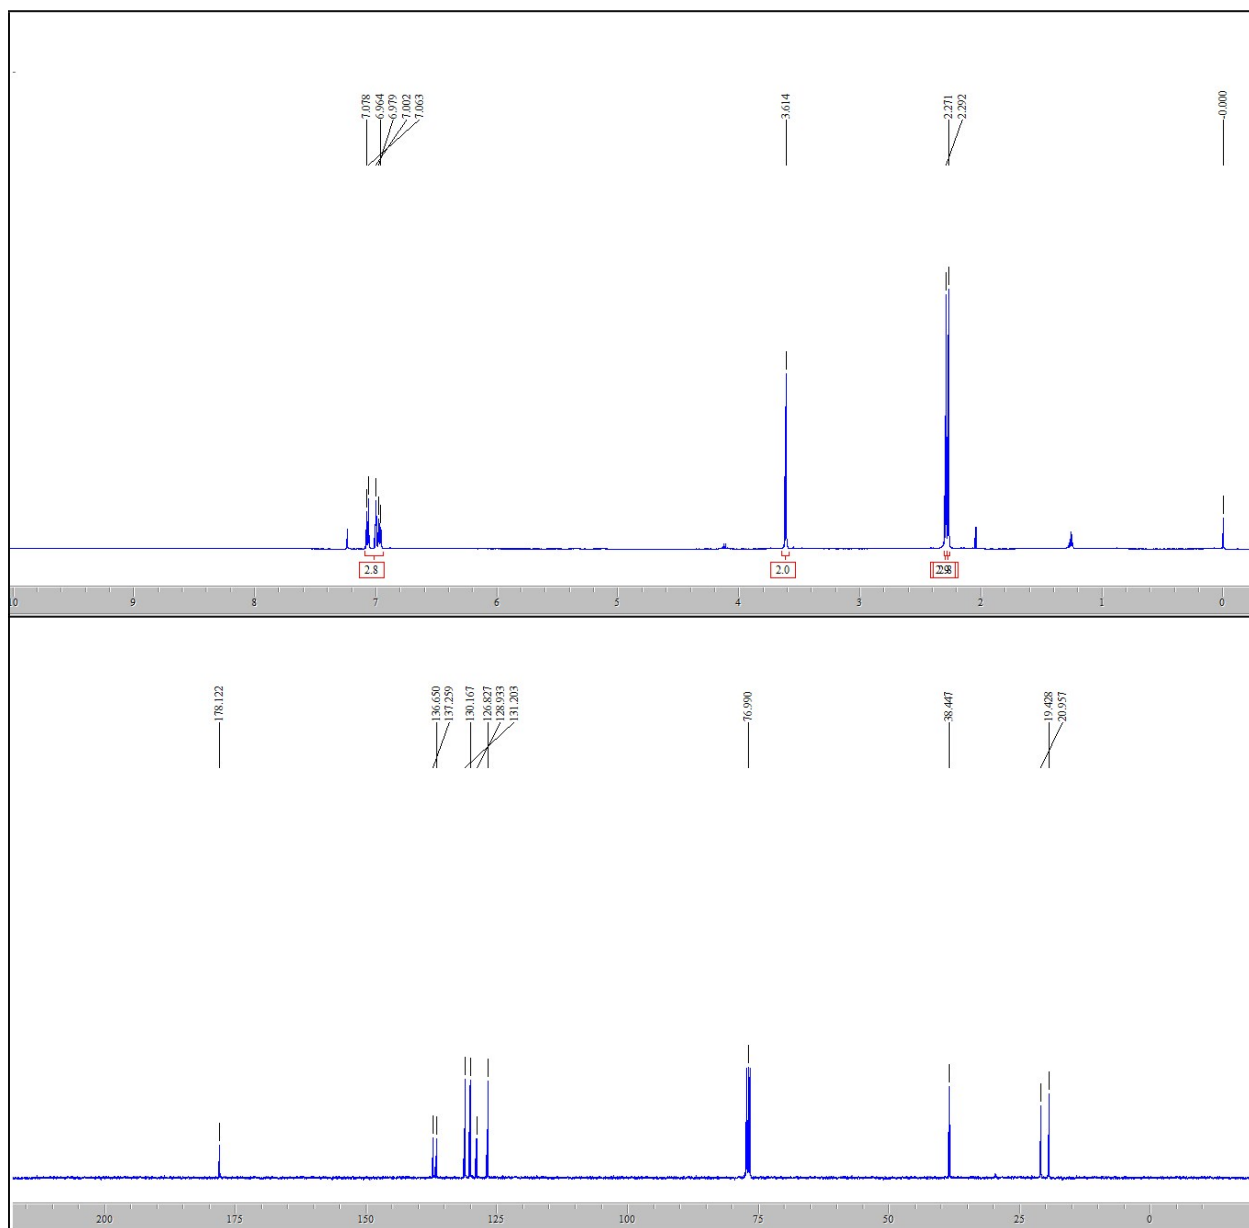

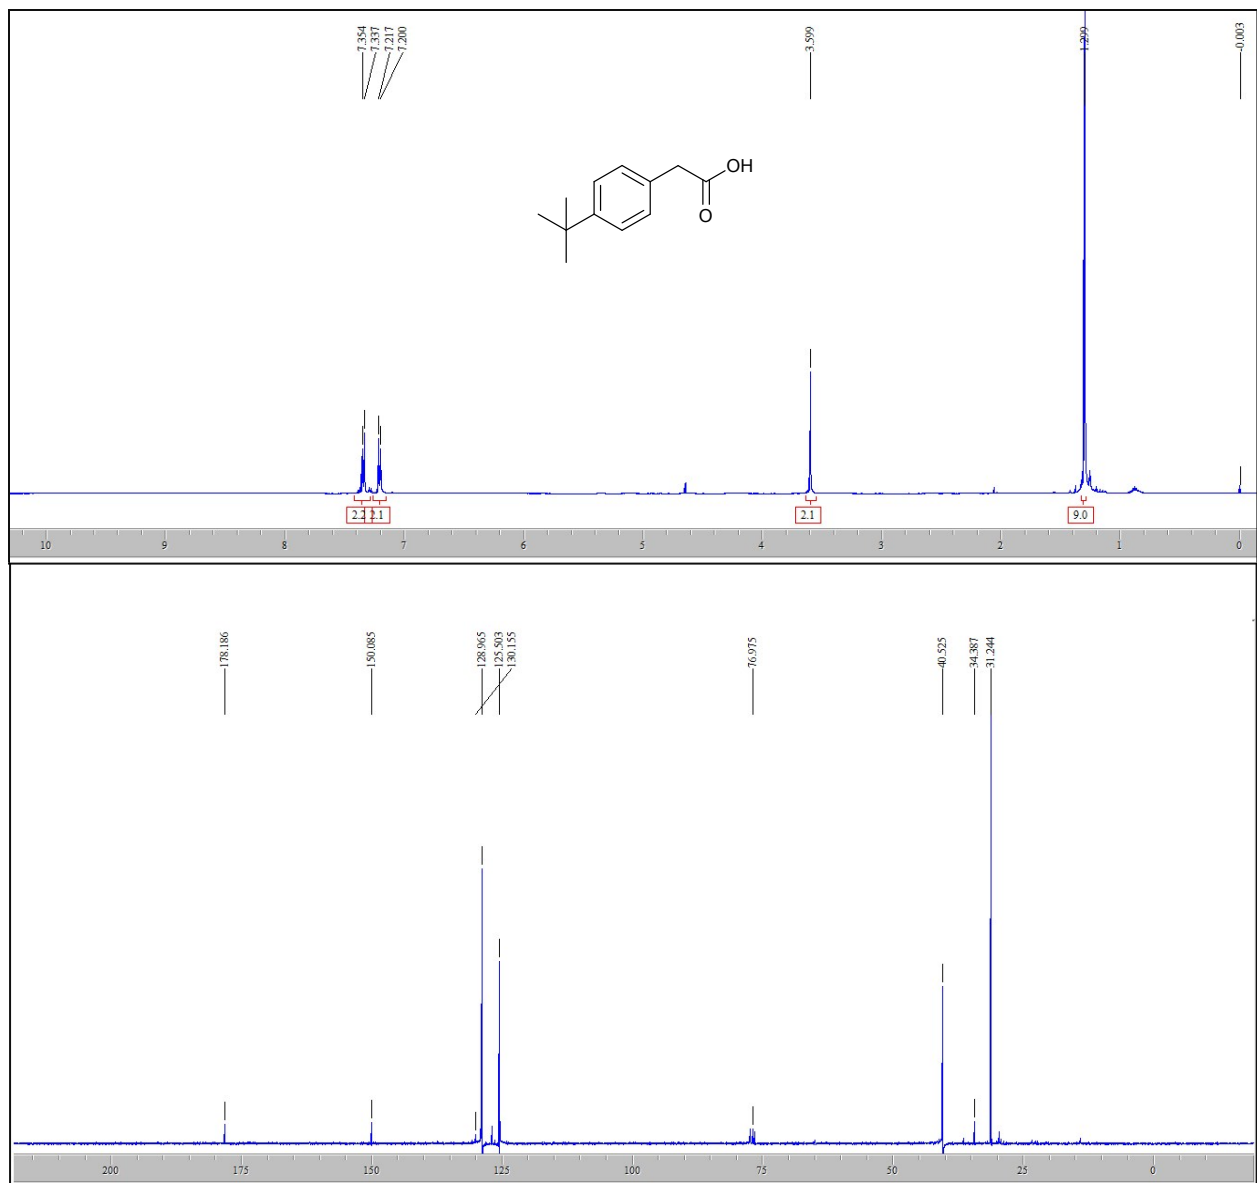

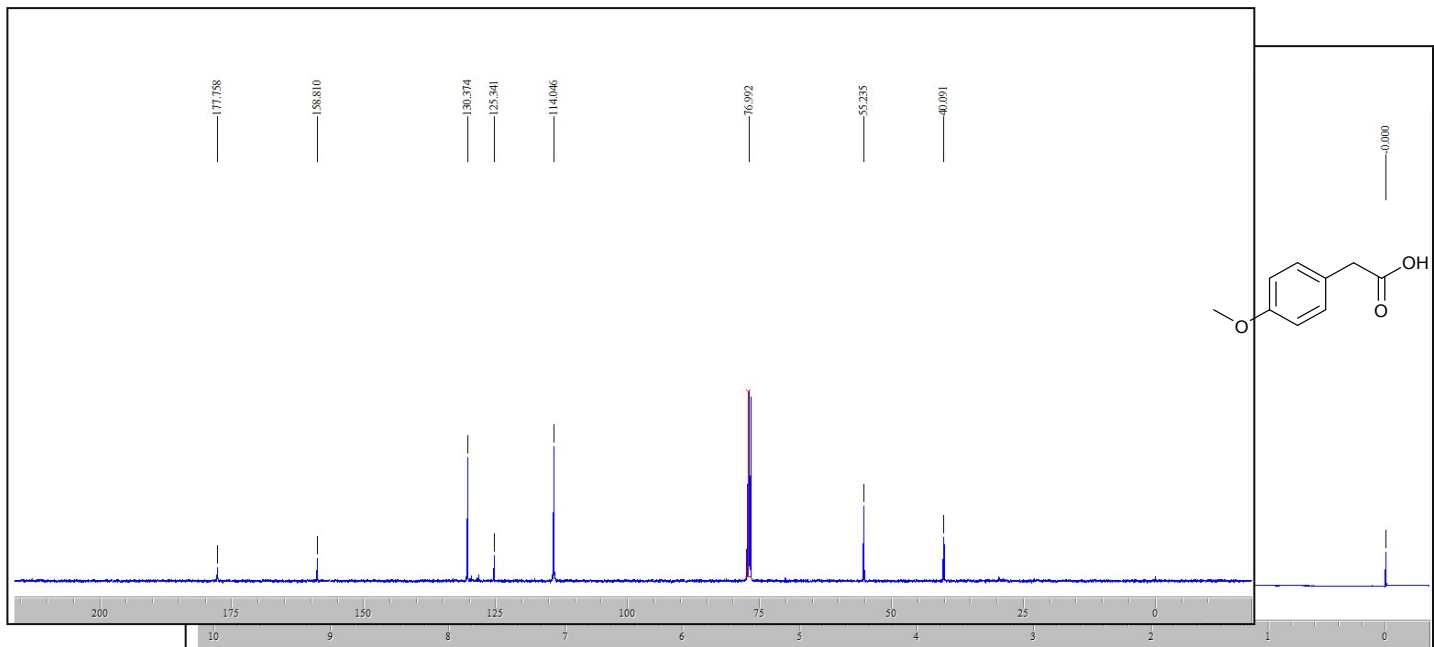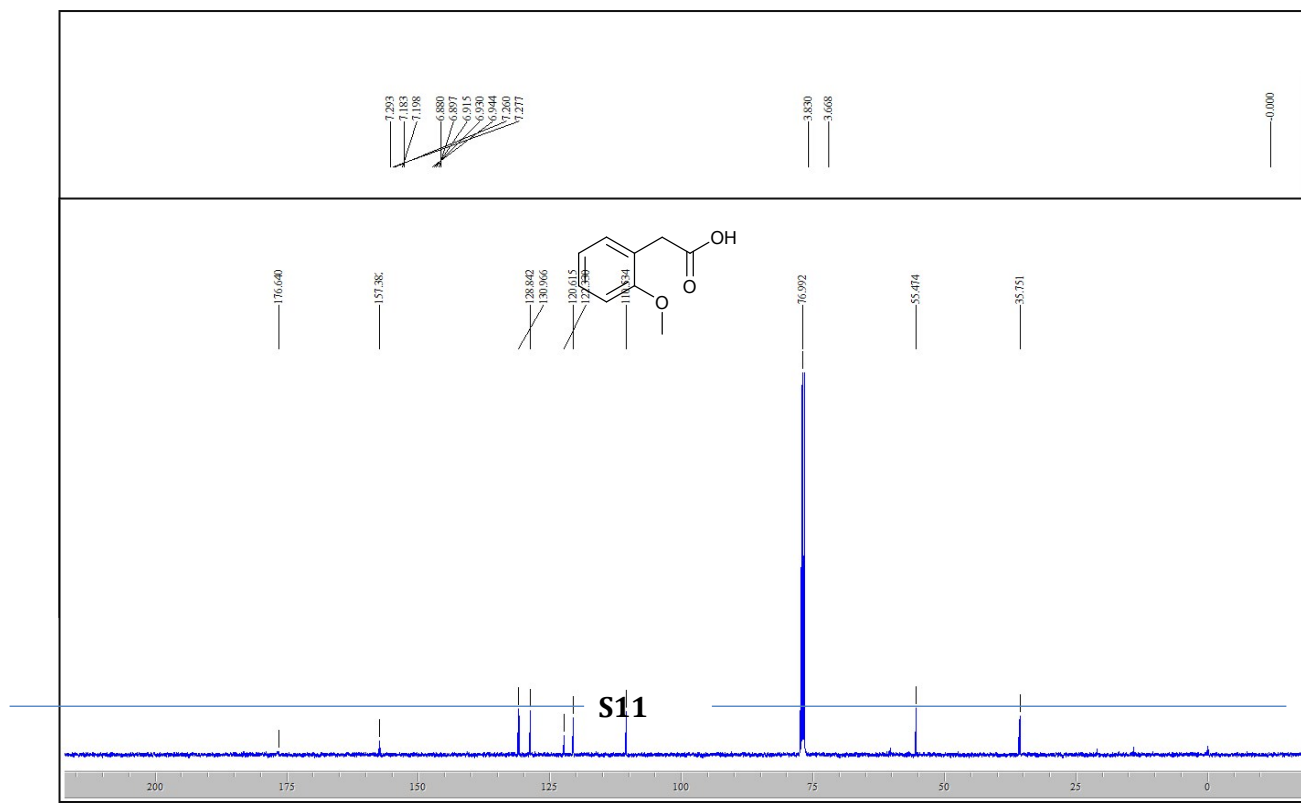



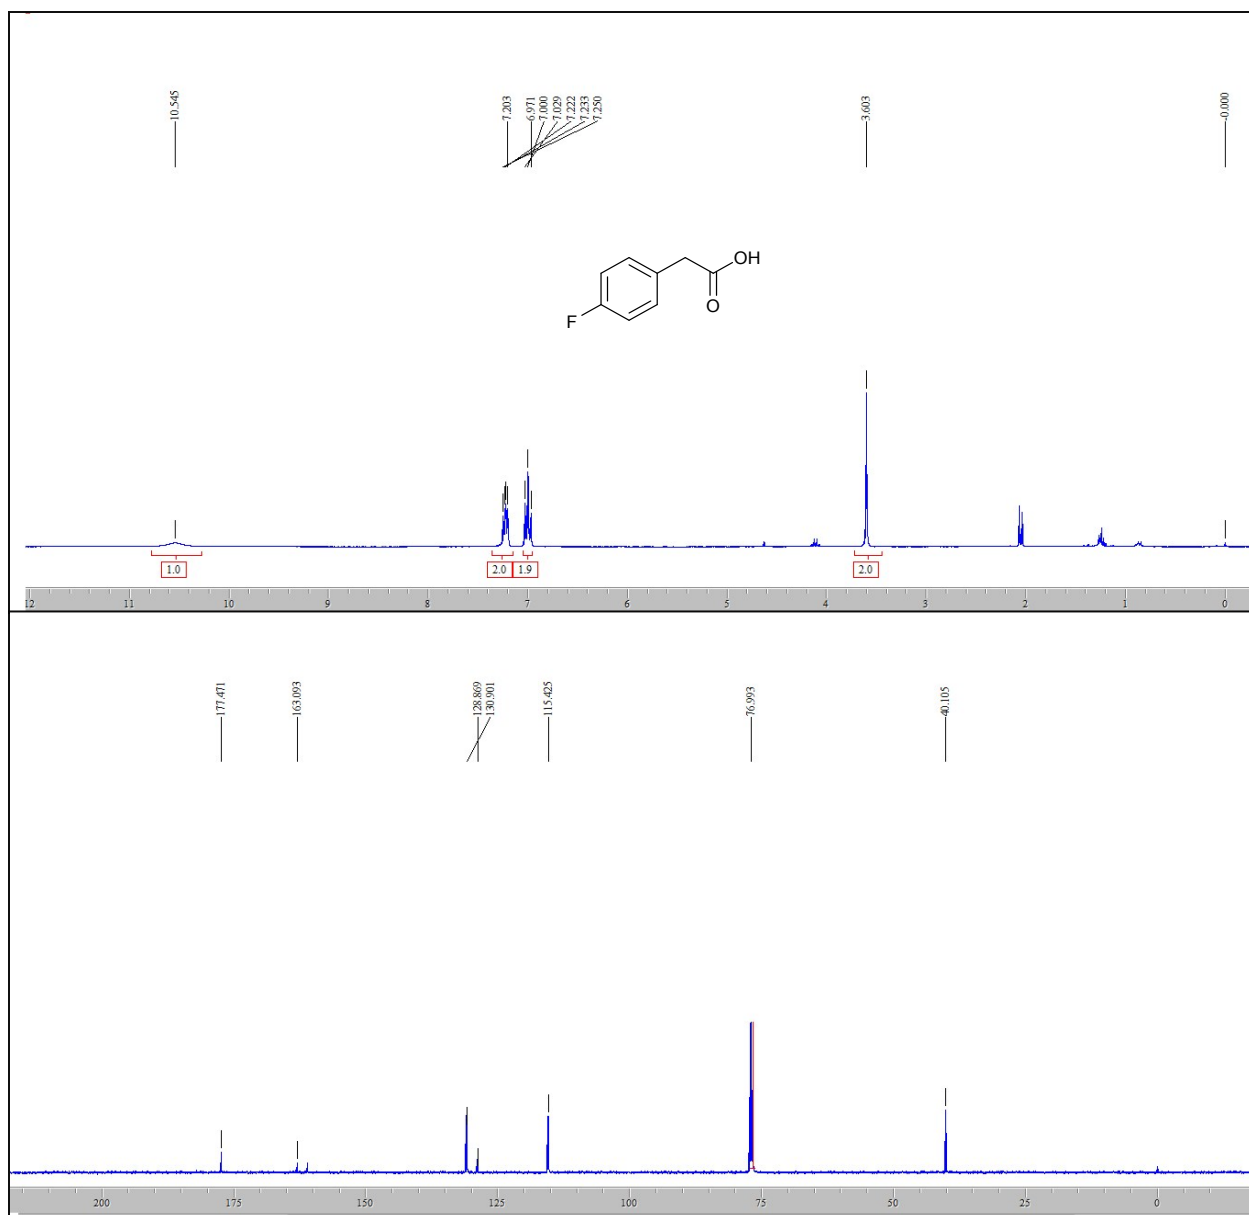

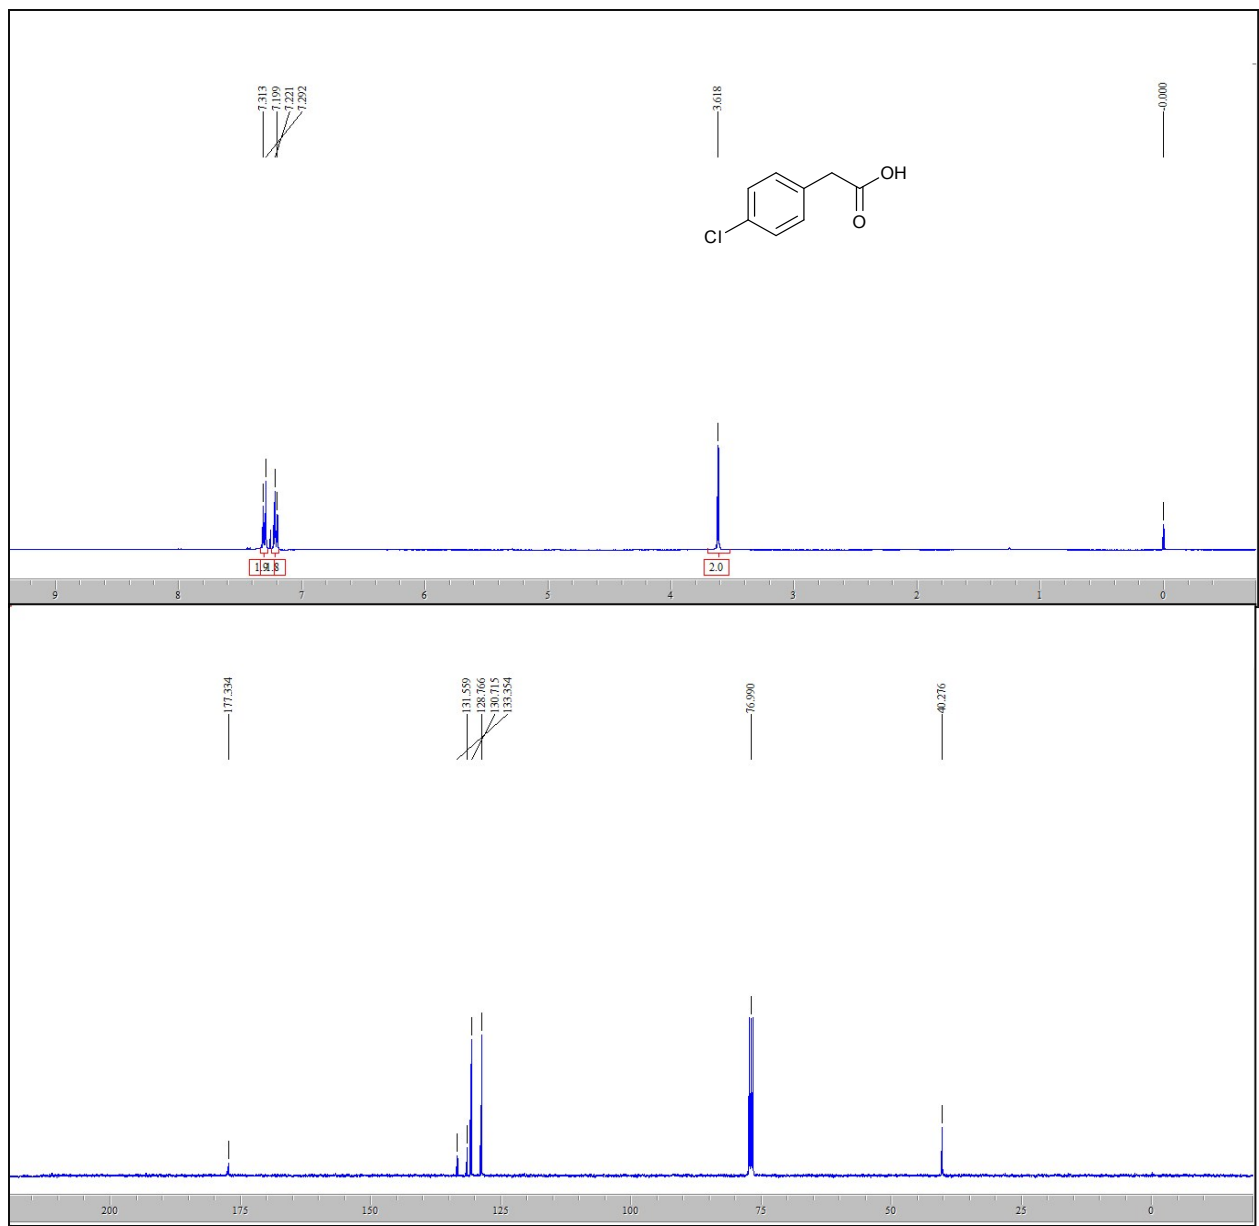

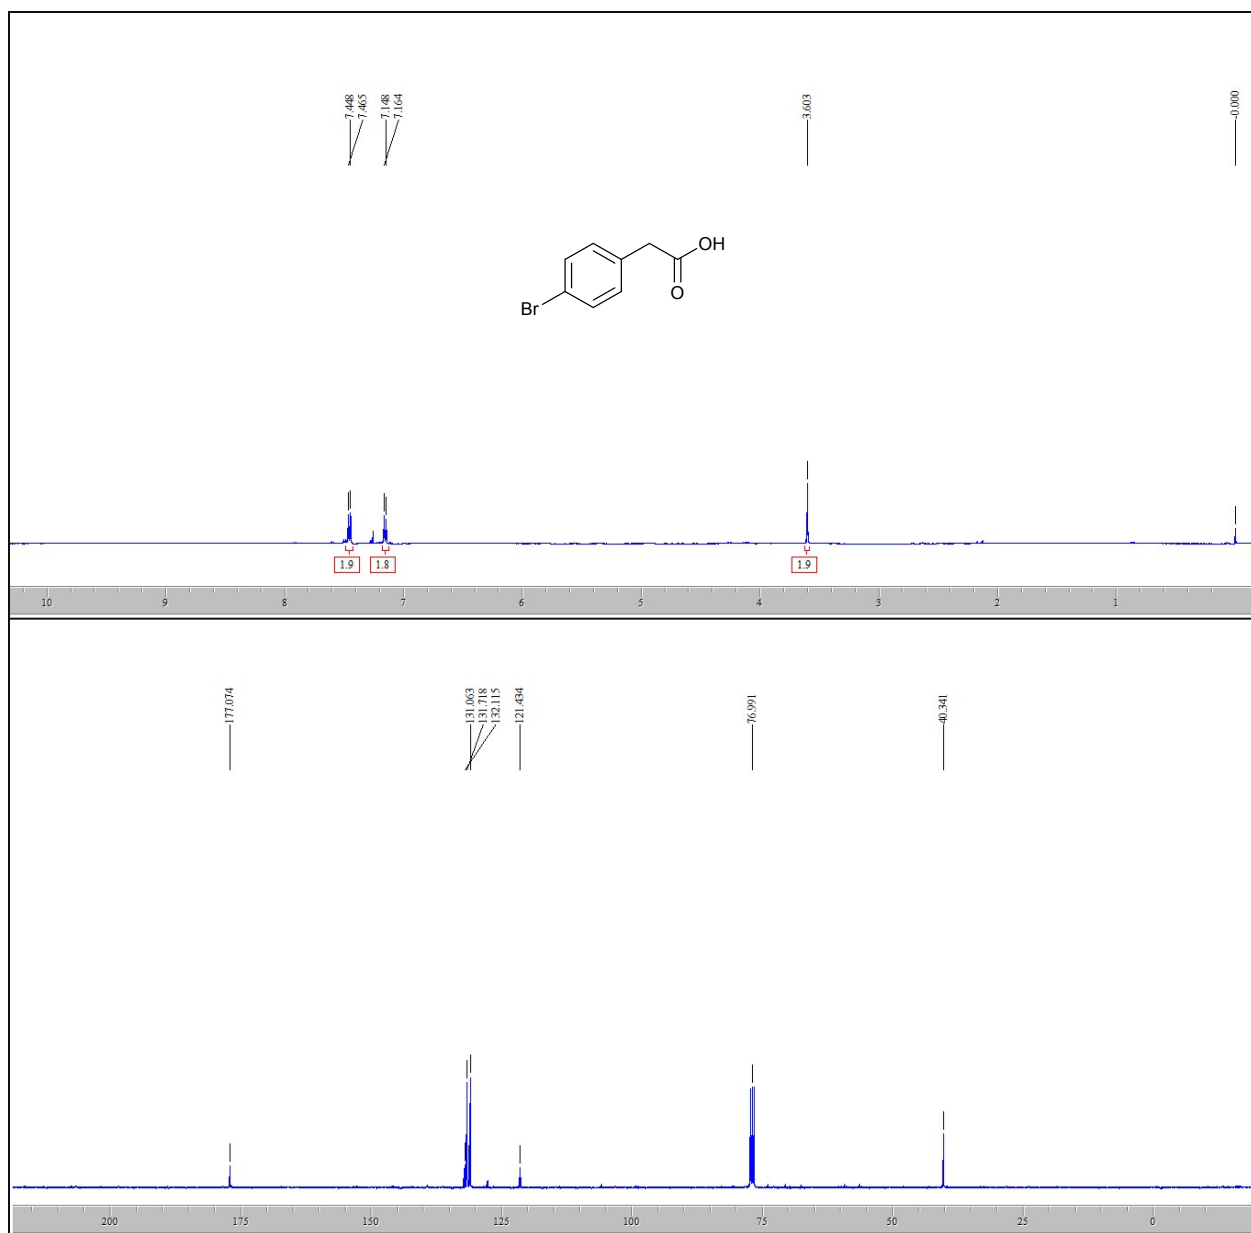

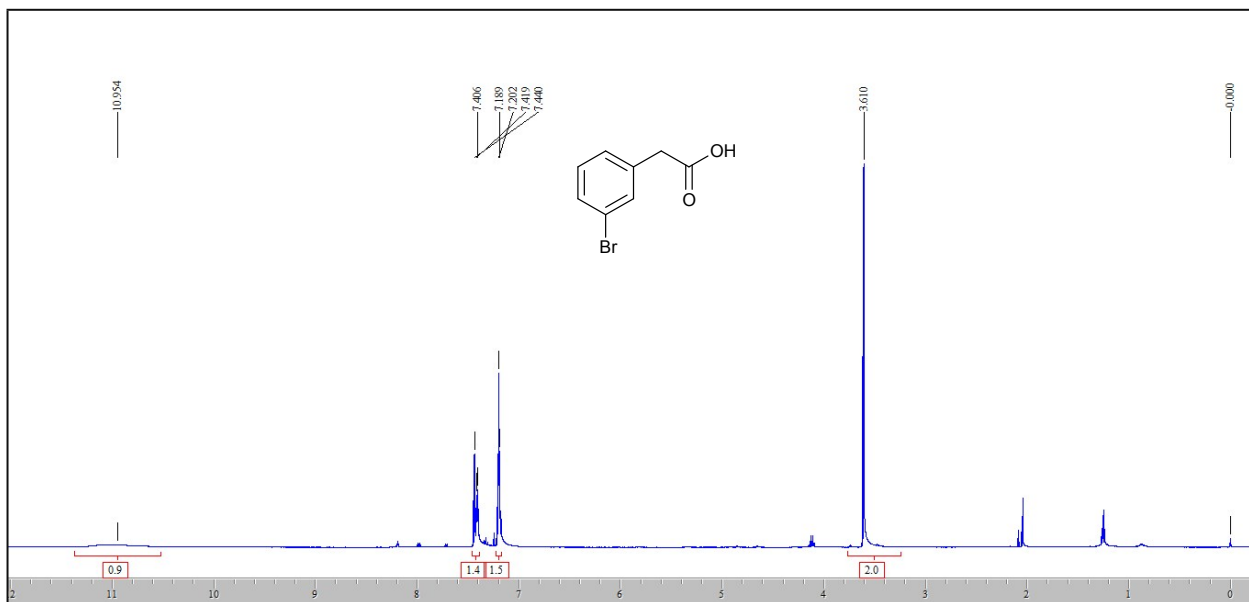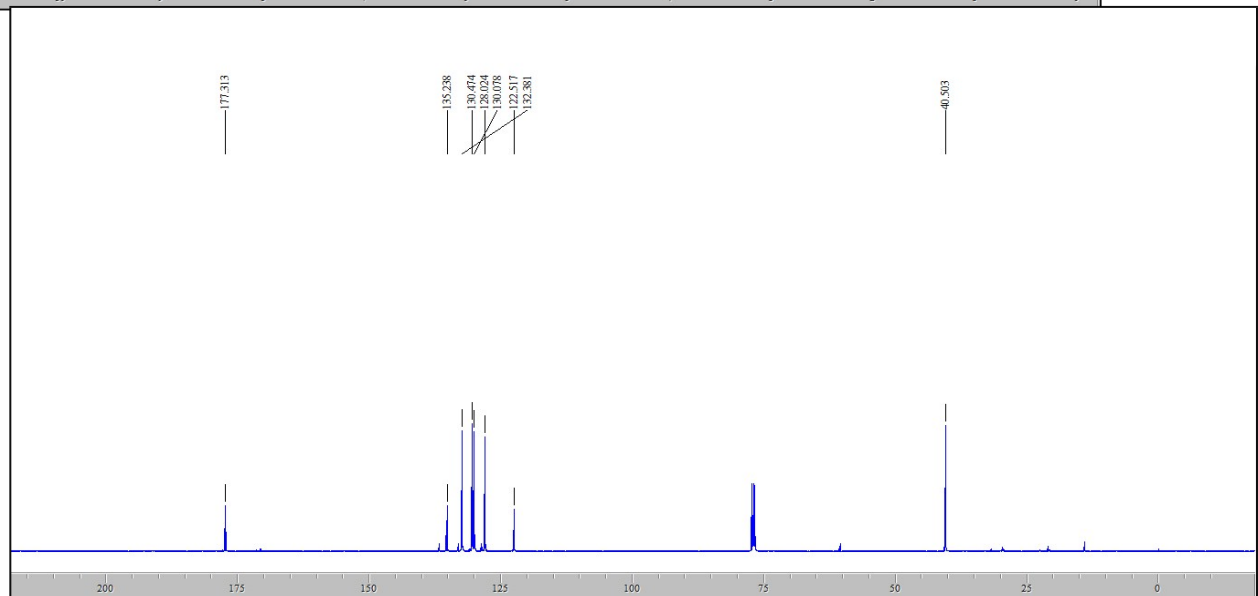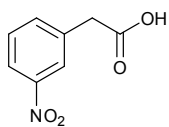



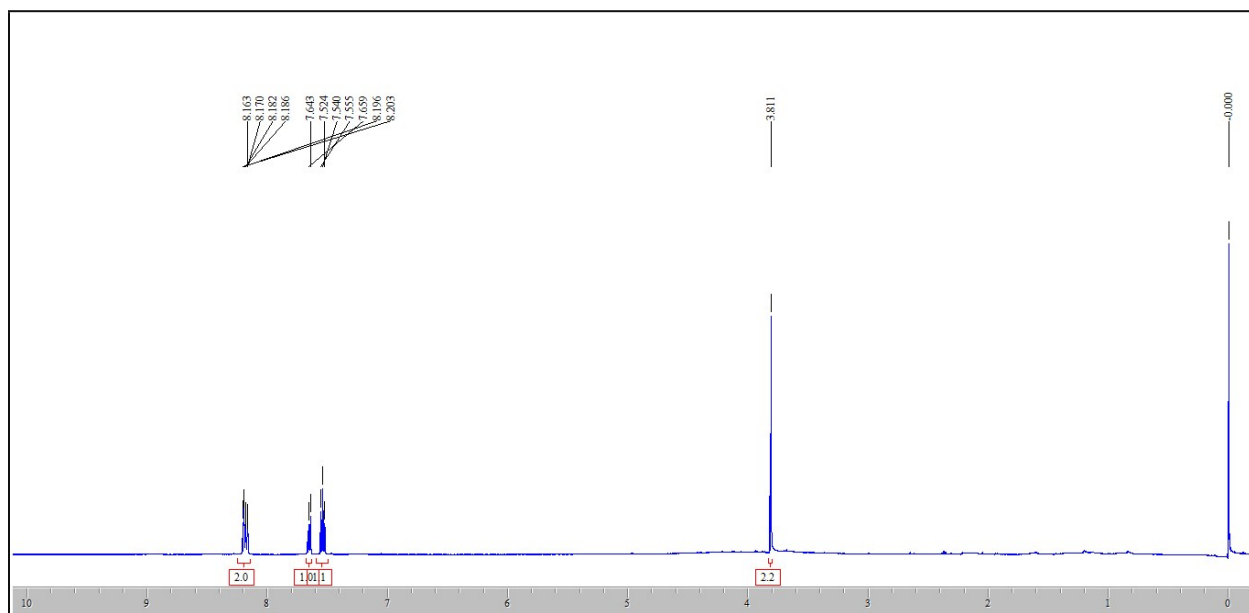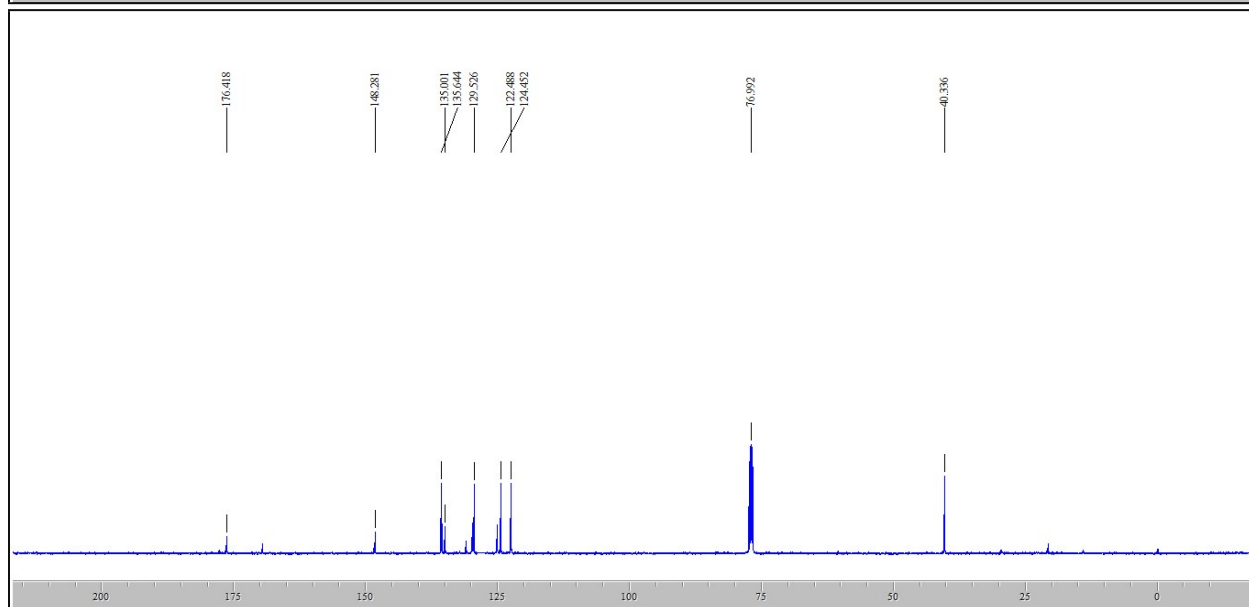

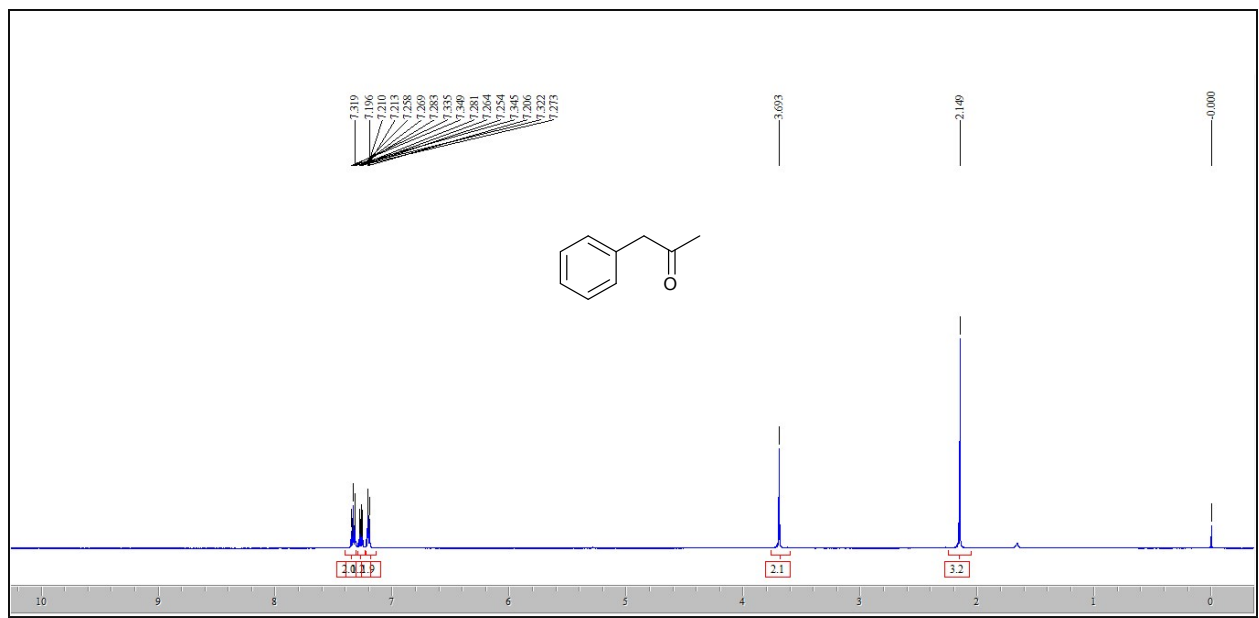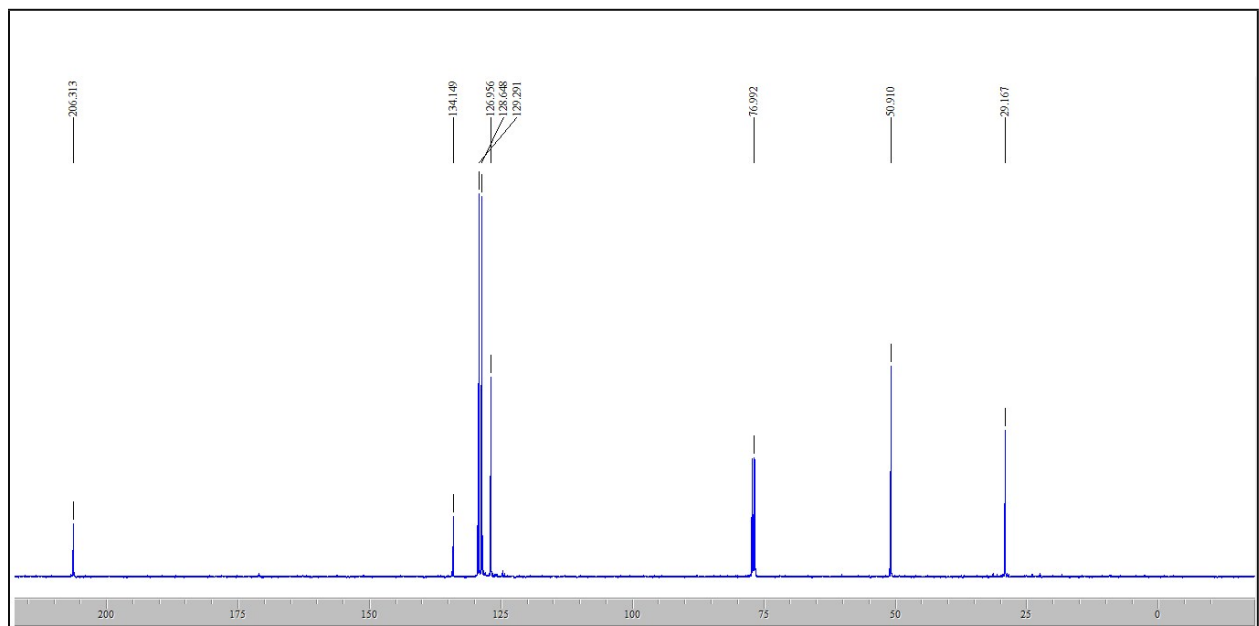

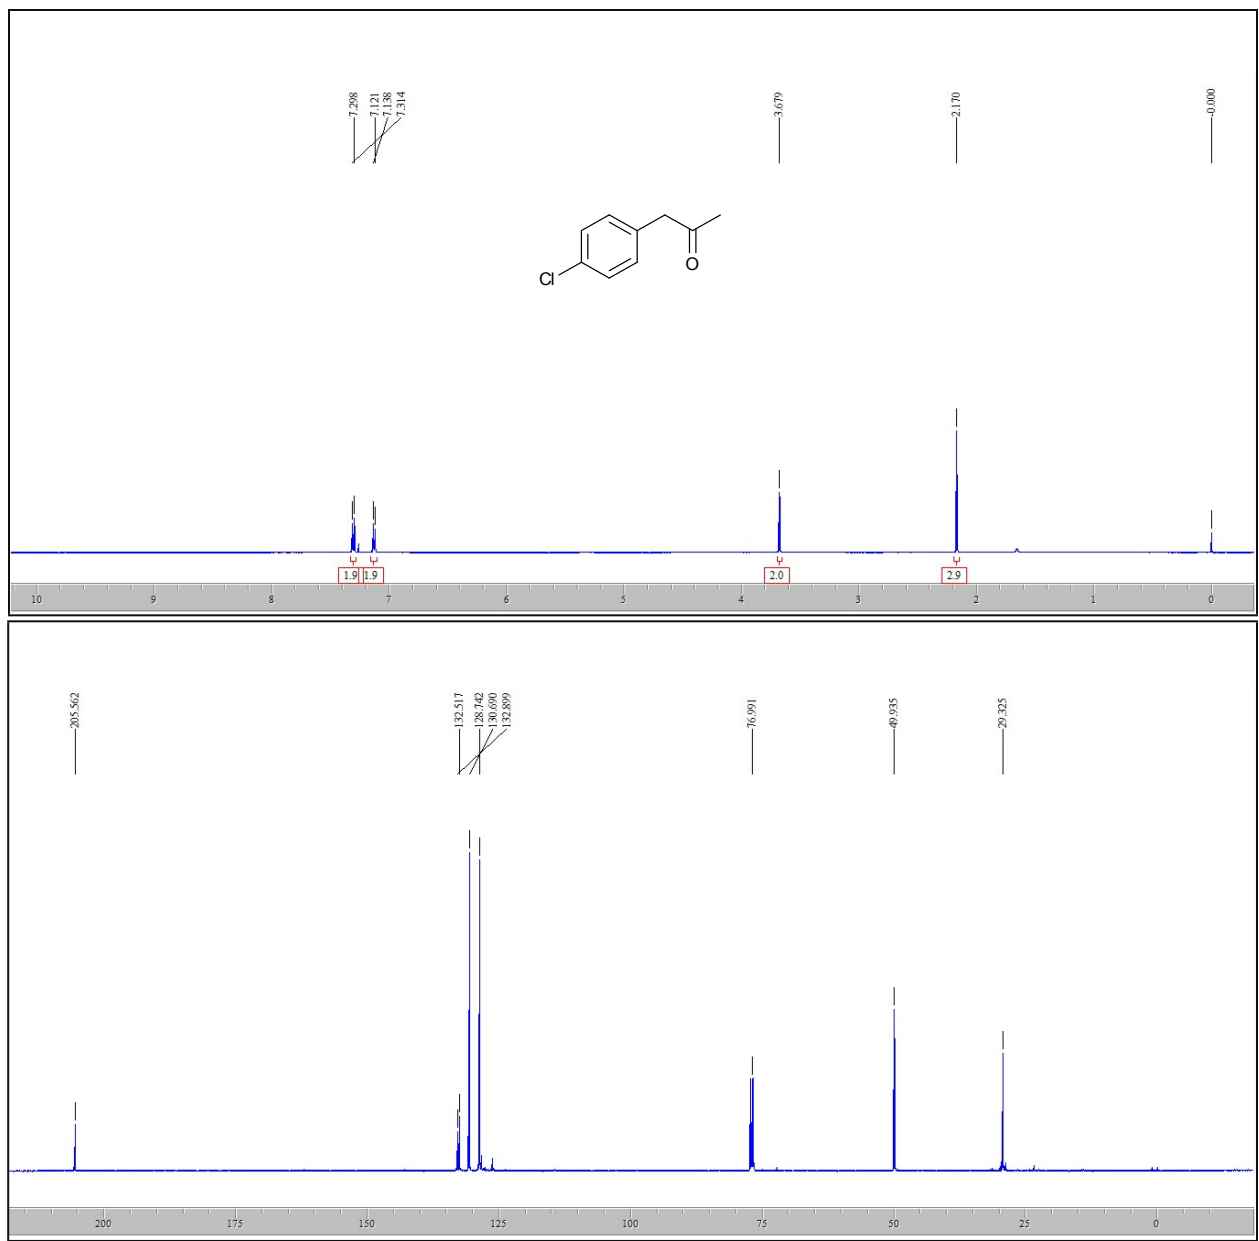

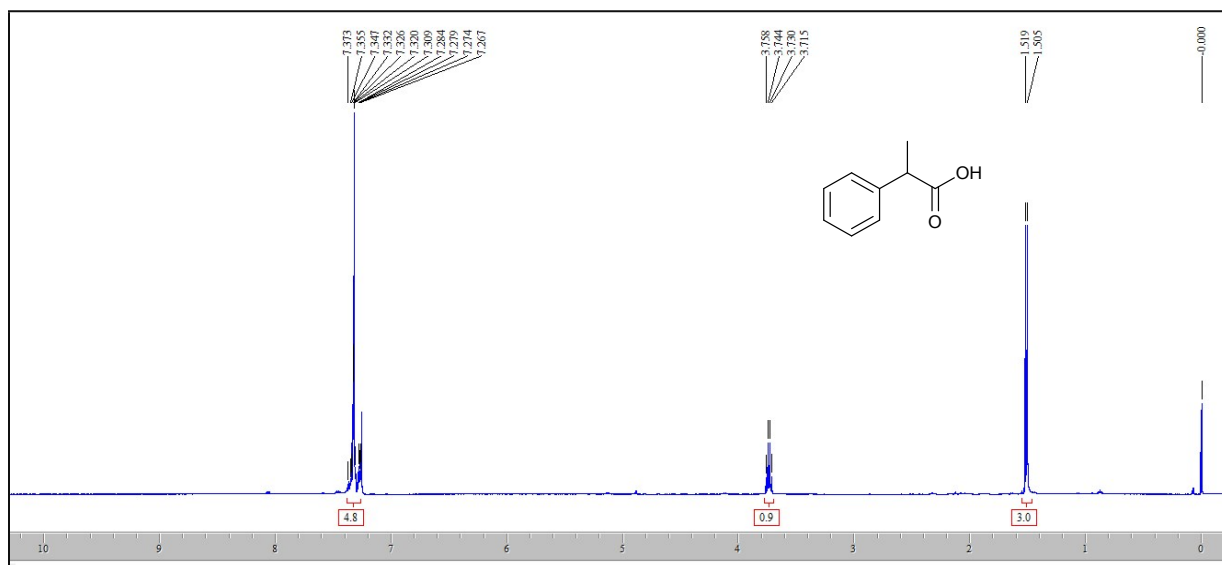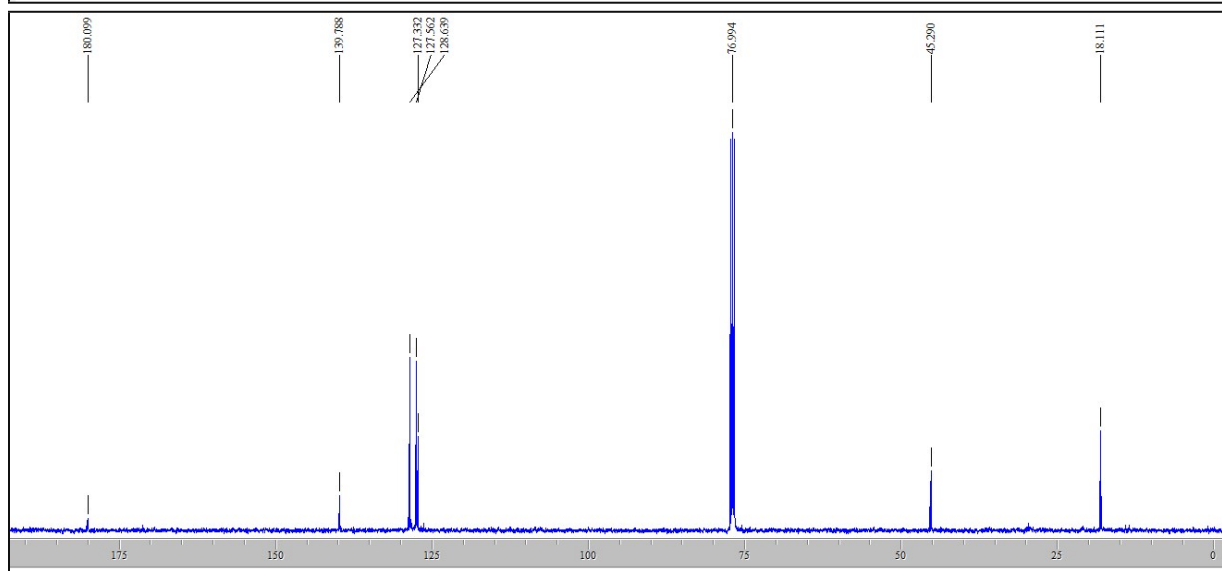

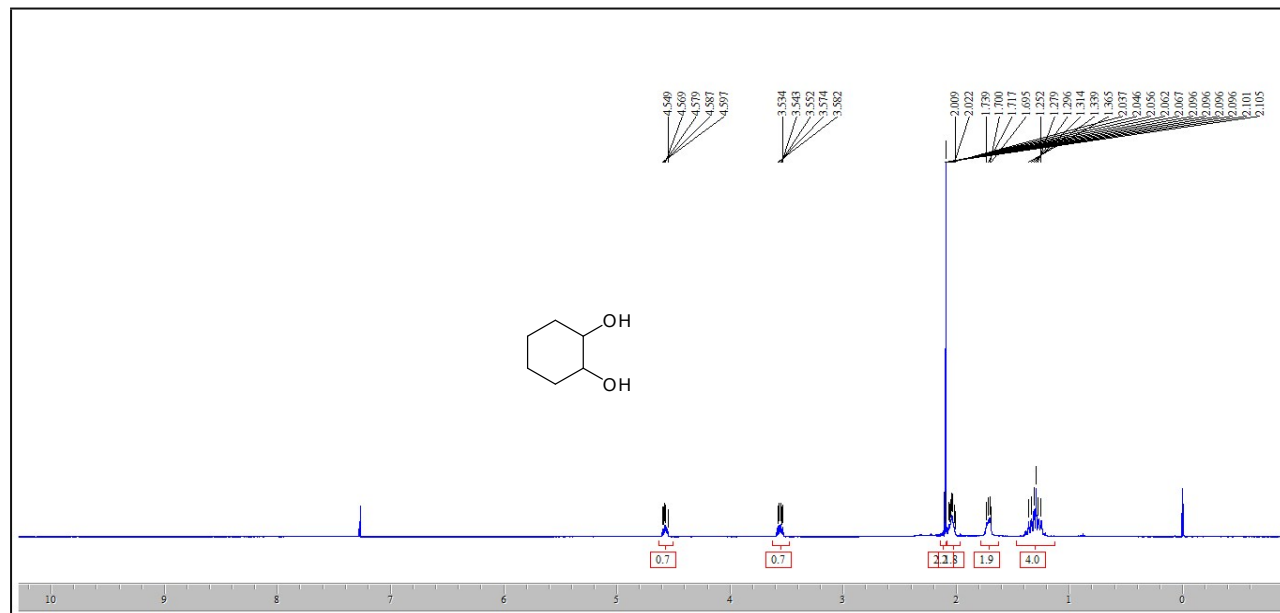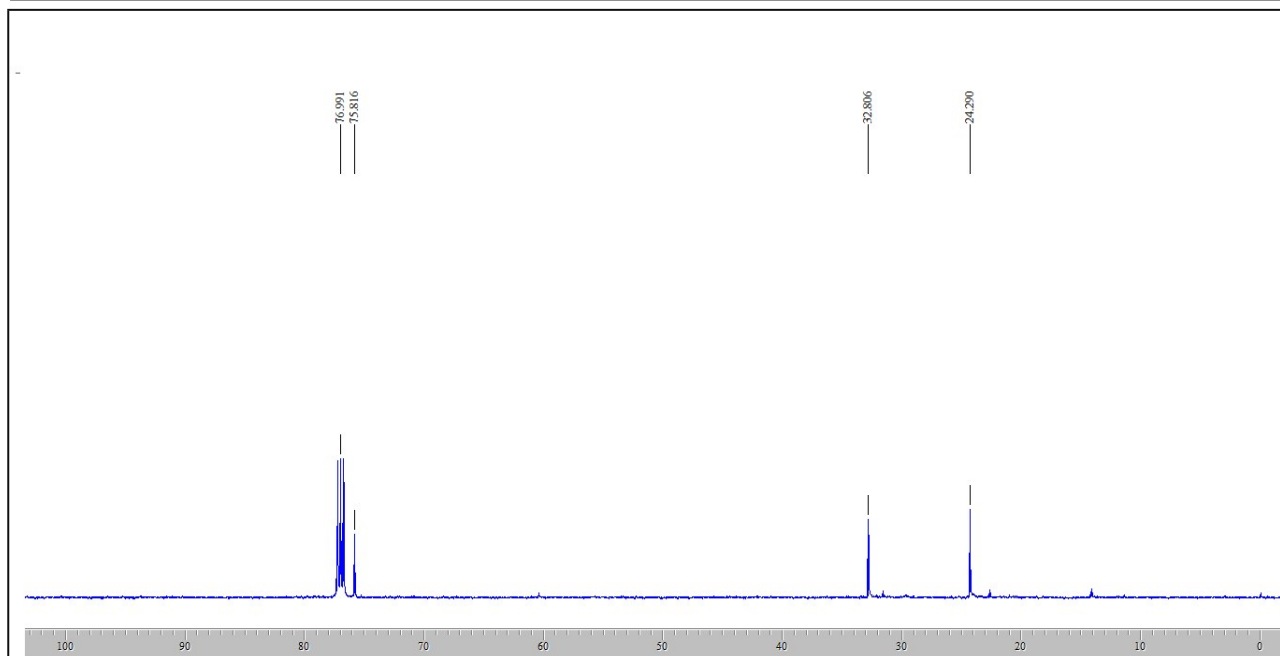

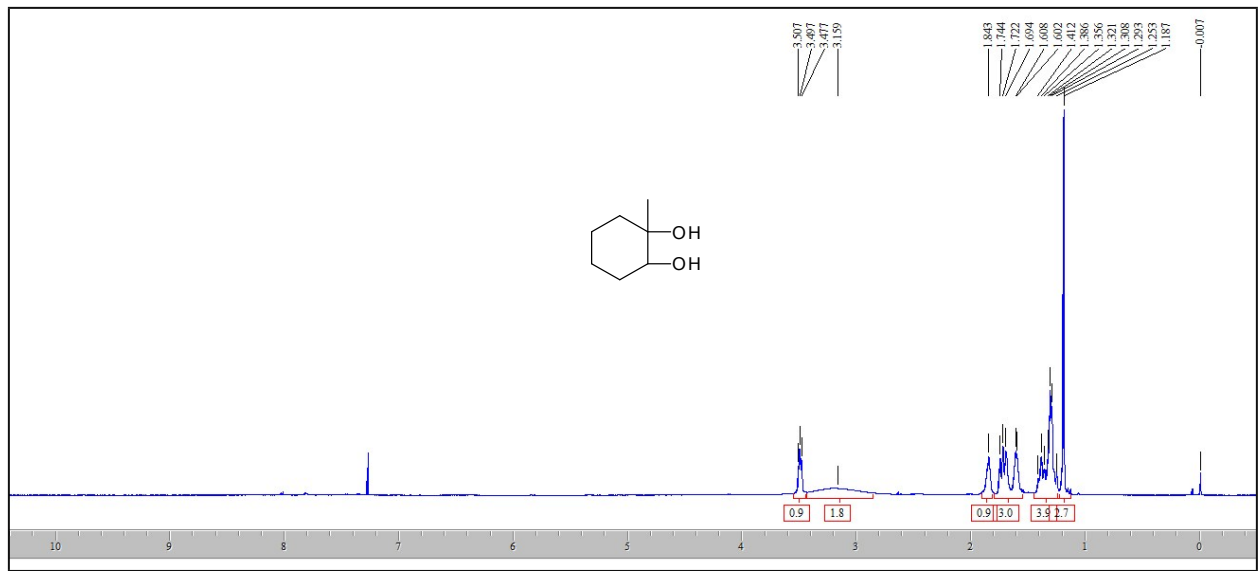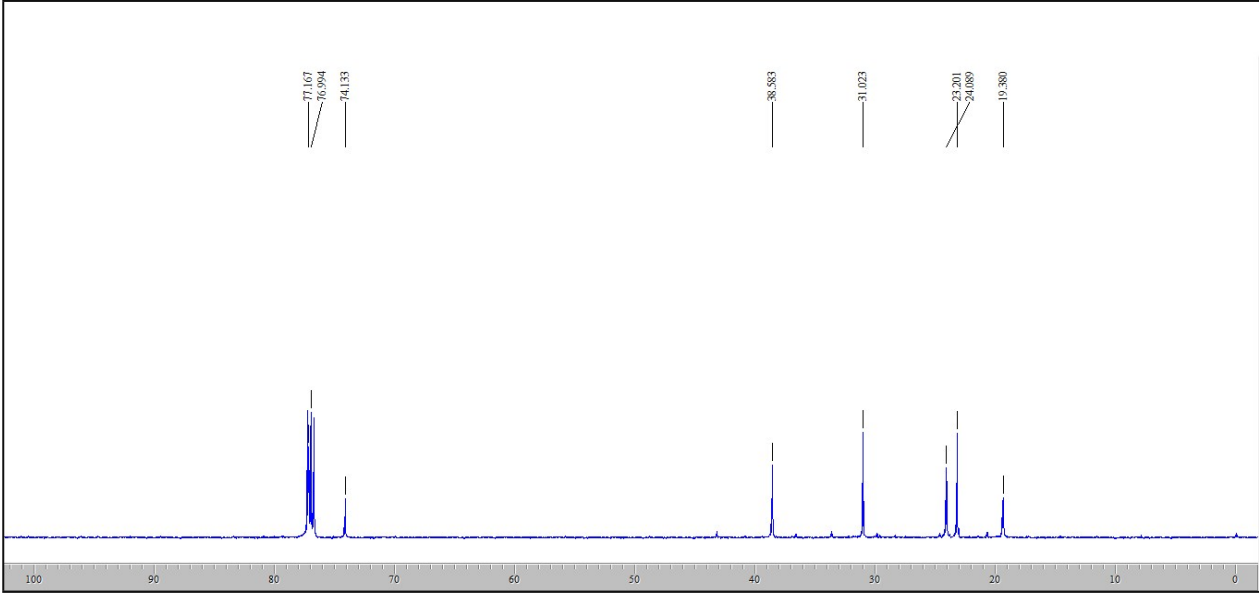

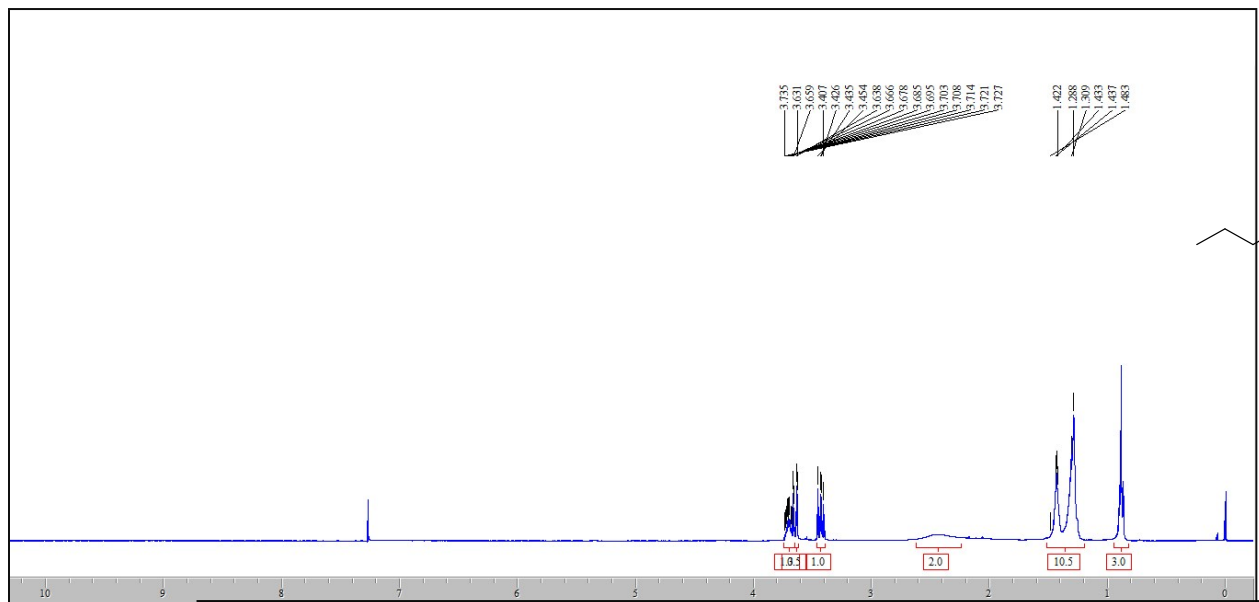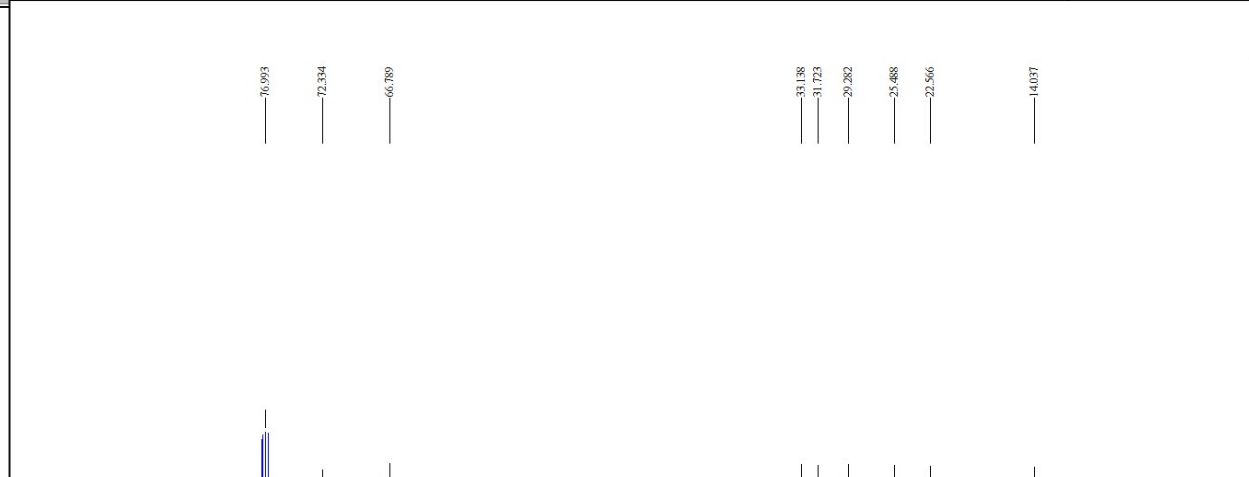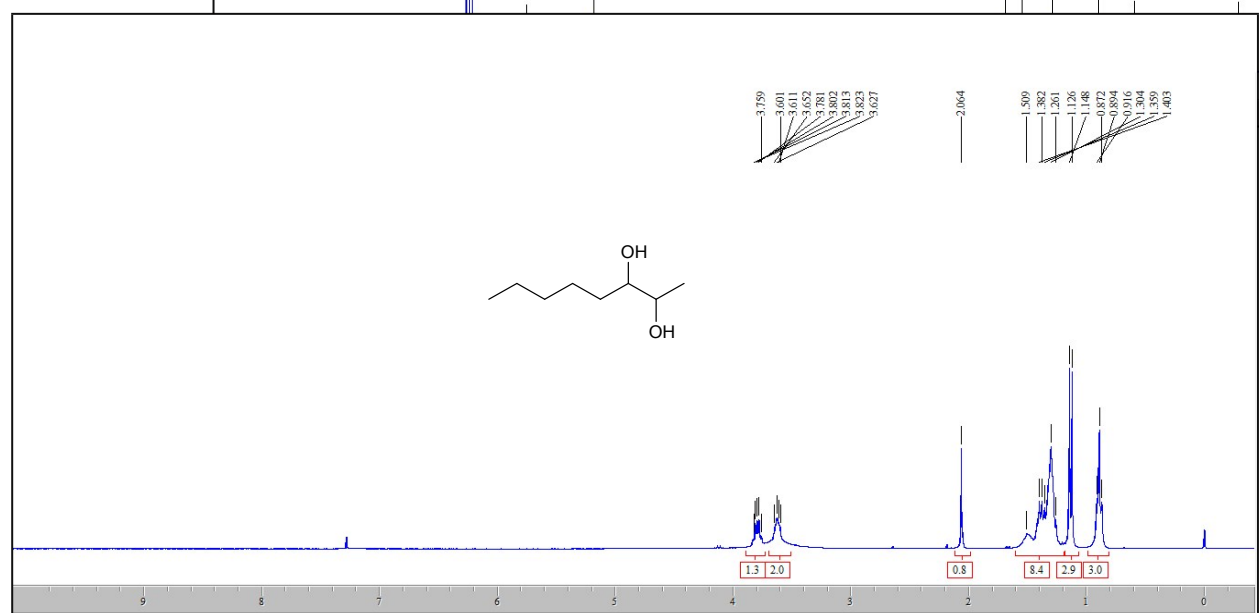

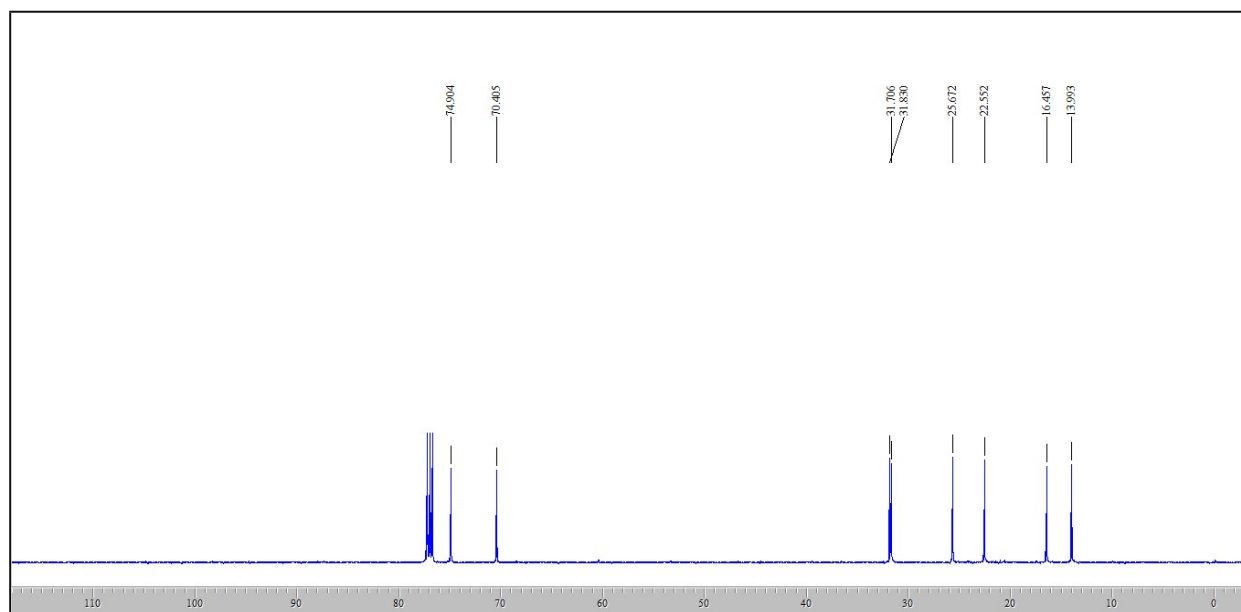

### Notes and references

- 1 T. León, A. Correa and R. Martin, *J. Am. Chem. Soc.*, 2013, **135**, 1221.
- 2 M. She, D. Xiao, B. Yin, Z. Yang, P. Liu, J. Li and Z. Shi, *Tetrahedron*, 2013, **69**, 7264.
- 3 A. A. Ibragimov and S. Yu. Yunusov, *Chem. Nat. Compd.*, 1985, **21**, 502.
- 4 S. Kamijo, Y. Amaoka and M. Inoue, *Synthesis*, 2010, 2475.
- 5 P. Fleming and D. F. O'Shea, *J. Am. Chem. Soc.*, 2011, **133**, 1698.
- 6 M. She, D. Xiao, B. Yin, Z. Yang, P. Liu, J. Li and Z. Shi, *Tetrahedron*, 2013, **69**, 7264.
- 7 J. E. Milne, J. A. Murry, A. King and R. D. Larsen, *J. Org. Chem.*, 2009, **74**, 445.
- 8 J. E. Milne, T. Storz, J. T. Colyer, O. R. Thiel, M. D. Seran, R. D. Larsen and J. A. Murry, *J. Org. Chem.*, 2011, **76**, 9519.
- 9 (a) J. McNulty and P. Das, *Tetrahedron*, 2009, **65**, 7794; (b) P. Strazzolini, G. Verado, F. Gorassini and A. G. Giumanini, *Bull. Chem. Soc. Jpn.*, 1995, **68**, 1157.



- 10 Y. F. Wang, Y. R. Gao, S. Mao, Y. L. Zhang, D. D. Guo, Z. L. Yan, S. H. Guo and Y. Q. Wang, *Org. Lett.*, 2014, **16**, 1610.
- 11 Z. Duo, J. Yongwen and M. Dawei, *Tetrahedron*, 2014, **70**, 3327.
- 12 (a) J. J. R. Frew, K. Damian, H. Van Rensburg, A. M. Z. Slawin, R. P. Tooze and M. L. Clarke, *Chem. Eur. J.*, 2009, **15**, 10504. (b) M. D. Greenhalgh and S. P. Thomas, *J. Am. Chem. Soc.* 2012, **134**, 11900.
- 13 Y. Liu, M. Wang, W. Ren, Y. Xu and X. B. Lu, *Angew. Chem. Int. Ed.*, 2015, **54**, 7042.
- 14 B. Balagam, R. Mitra and D. E. Richardson, *Tetrahedron Lett.*, 2008, **49**, 1071.
- 15 B. Plietker, M. Niggemann and A. Pollrich, *Org. Biomol. Chem.* 2004, **2**, 1116.
- 16 (a) W. Kroutil, M. Mischitz and K. Faber, *J. Chem. Soc., Perkin Trans. I.*, 1997, 3629; (b) A. Closson, M. Johansson and J. E. Bäckvall, *Chem. Commun.*, 2004, 1494.
